# Supplementary material
Source: publisher site journal article supplement (https://www.spandidos-publications.com/7127/downloadSupplementary)
Supplement: Supplementary file 1 [file downloadSupplementary]

## Sheet: Sheet1
Table SIV. Gene summary for the non-hypertension group (n=48).
HUGO symbol	Frame shift deletion	Frame shift insertion	In-frame deletion	In-frame insertion	Missense mutation	Nonsense mutation	Splice site	Total	Mutated samples	Altered samples
EGFR	0	0	14	1	23	1	0	39	32	32
TP53	1	1	1	0	19	3	0	25	24	24
KRAS	0	0	0	0	4	0	0	4	4	4
MAP2K1	0	1	1	0	2	0	0	4	3	3
RB1	0	0	1	0	0	3	0	4	3	3
APC	0	1	0	0	1	1	0	3	3	3
CTNNB1	0	0	0	0	3	0	0	3	3	3
STK11	0	0	0	0	1	1	1	3	3	3
TPMT	0	0	0	0	3	0	0	3	3	3
NTRK1	0	0	1	0	2	0	0	3	2	2
CYP2D6	0	0	0	0	0	0	2	2	2	2
DPYD	0	0	0	0	2	0	0	2	2	2
FGFR3	0	1	0	0	1	0	0	2	2	2
KIT	1	0	0	0	1	0	0	2	2	2
PIK3CA	0	0	0	0	2	0	0	2	2	2
SOD2	0	0	0	0	2	0	0	2	2	2
ALK	0	0	0	0	1	0	0	1	1	1
BRAF	0	0	0	0	1	0	0	1	1	1
ERBB2	0	0	0	0	1	0	0	1	1	1
ESR1	0	0	0	0	1	0	0	1	1	1
FGFR2	0	0	0	1	0	0	0	1	1	1
GNAS	0	0	0	0	1	0	0	1	1	1
NOS3	0	0	1	0	0	0	0	1	1	1
NOTCH1	0	0	0	0	1	0	0	1	1	1
PDGFRA	0	0	0	0	1	0	0	1	1	1
RET	0	0	0	0	1	0	0	1	1	1
HUGO, Human Genome Organisation.
